# Supplementary material for: CircMBOAT2 promotes FASN-mediated lipid metabolism reprogramming and progression in intrahepatic cholangiocarcinoma
Source: Research Square preprint supplement (doi:10.21203/rs.3.rs-1525828/v1), 2022-04-11
Supplement: Supplementary file 1 [file 31b7798891f04be31a5be72c.doc]

**Supplementary Materials**

The sequences of all primers and oligonucleotide used in the study.

| Gene | Forward primer (5’ to 3’) | Reverse primer (5’ to 3’) |
| --- | --- | --- |
| β-actin  GAPDH | CATGTACGTTGCTATCCAGGC  CGGAGTCAACGGATTTGGTCGTAT | CTCCTTAATGTCACGCACGAT  AGCCTTCTCCATGGTGGTGAAGAC |
| U6 | CTCGCTTCGGCAGCACA | AACGCTTCACGAATTTGCGT |
| circMBOAT2 (divergent primer)  circMBOAT2  (convergent primer) | GTCAACTTTGTAGTGTGCCAACT  GAGTGGAGAACATGCACAAGTCA | TTGTGCATGTTCTCCACTCC  GTAGATAAGTTCGAAACCAAATGGC |
| MBOAT2 | CTCGCTGGGACTTAATTTCCAA | GGTTCGTTCATAACACACCCTT |
| FASN | GTGGTGGGCTTGGTGAACTGTC | AGGTGCTGCTGAGGTTGGAGAG |
| Oligonucleotide targets | Sense (5’ to 3’) | Antisense (5’ to 3’) |
| si-circMBOAT2#1 | GAGAACAUGCACAAGUCAA | CUCUUGUACGUGUUCAGUU |
| si-circMBOAT2#2 | CAUGCACAAGUCAACUUUG | GUACGUGUUCAGUUGAAAC |
| si-NC | UUCUCCGAACGUGUCACGU | ACGUGACACGUUCGGAGAA |
| si-PTBP1#1 | GCCUCAACGUCAAGUACAA | UUGUACUUGACGUUGAGGC |
| si-PTBP1#2 | GCGUCGUCAAAGGAUUCAA | UUGAAUCCUUUGACGACGC |
| si-FASN#1  si-FASN#2  si-FASN#3 | GCCGAGUACAAUGUCAACA  CUGCUAGGUAUGGAGUUCU  CAUGGAGCGUAUCUGUGAG | UAGCUCCUCAAACAGCUGC  AGAACUCCAUACCUAGCAG  CUCACAGAUACGCUCCAUG |
