# Supplementary material for: CircMBOAT2 promotes FASN-mediated lipid metabolism reprogramming and progression in intrahepatic cholangiocarcinoma
Source: Research Square preprint supplement (doi:10.21203/rs.3.rs-1525828/v1), 2022-04-11
Supplement: Supplementary file 3 [file ce6f1b47ad8930c16e6c7cba.xlsx]

## Sheet: Sheet1
Clinicopathological characteristics	The number of patients	gene expression		P-value
		Lower	Higher
		(n = 13)	(n = 14)
Age				0.436
≤ 60	16	7	9
> 60	11	6	5
Gender				0.28
Male	14	8	6
Female	13	5	8
Tumor size				0.016
< 5 cm	5	5	0
≥ 5 cm	22	8	14
Biliary calculi				0.5
No	23	12	11
Yes	3	1	2
Hepatitis				0.56
No	23	11	12
Yes	3	1	2
Parasitic infection				0.11
No	23	13	10
Yes	3	0	3
Degree of pathological differentiation				0.481
moderate and high differentiation	26	12	14
poor differentiation	1	1	0
Lymph node metastasis				0.529
No	25	12	12
Yes	3	1	2
TNM stage				0.546
I-II	20	10	10
III-IV	7	3	4
Adjacent organ invasion				0.538
No	22	11	11
Yes	5	2	3
